# Supplementary material for: Hikikomori Is Most Associated With Interpersonal Relationships, Followed by Suicide Risks: A Secondary Analysis of a National Cross-Sectional Study
Source: PubMed Central journal article supplement (PMC6476969; doi:10.3389/fpsyt.2019.00247), 2019-04-16
Supplement: Table_1.pdf [file Table_1.pdf]

Supplementary Table 1: Sensitivity analyses of the association between the hikikomori condition and psychiatric factors (one or more risks) with psychiatric factors categorized into binary variables

|                            | Model 1<br>OR (95% CI) | Model 2<br>OR (95% CI) | Model 3<br>OR (95% CI) |
|----------------------------|------------------------|------------------------|------------------------|
| Suicide risks              | 5.36 (2.76-10.43)      | 3.22 (1.56-6.64)       | 2.83 (1.35-5.92)       |
| Violent tendencies         | 1.23 (0.61-2.47)       | 0.74 (0.36-1.51)       | 0.71 (0.34-1.47)       |
| Interpersonal difficulties | 5.59 (3.06-10.19)      | 3.59 (1.86-6.95)       | 2.94 (1.50-5.79)       |
| OCB                        | 2.03 (1.19-3.47)       | 0.97 (0.54-1.72)       | 0.86 (0.47-1.56)       |
| Dependencies               | 1.93 (1.06-3.51)       | 1.28 (0.68-2.40)       | 1.09 (0.56-2.09)       |

Model 1 = Odds ratio adjusted for age, sex, number of family members, and social class.

Model 2 = Odds ratio adjusted for age, sex, numbers of family members, social class, and all psychiatric factors.

Model 3 = Odds ratio adjusted for age, sex, numbers of family members, social class, all psychiatric factors, and history of psychiatric treatment.
